# Supplementary material
Source: PubMed Central journal article supplement (PMC4813374)
Supplement: BPH-173-015-s001.pdf [file BPH-173-015-s001.pdf]

1 **Supporting Information – Figure Legends**

2 **Fig. S1.**

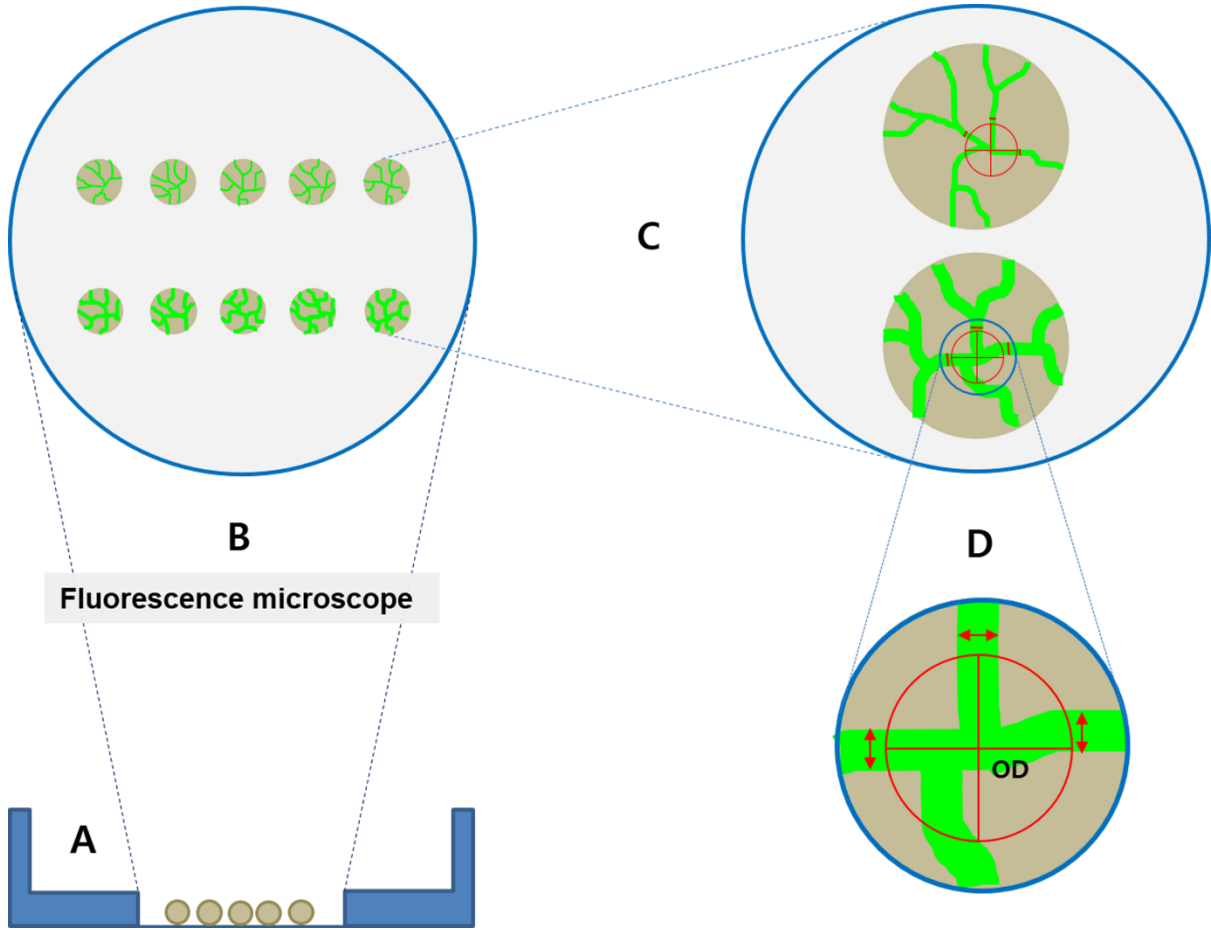

3

4 **Fig. S1.** Diagram depicting measurement of the hyaloid-retinal vessels diameter. (A) Lens in  
5 a dish with a coverglass. (B) Lens alignments under the fluorescence microscope. The optic  
6 disc (OD) was displayed up. (C) Fluorescence microscopy images. (D) The diameter of  
7 hyaloid vessels was measured in three main branches (red arrow) from the OD into the first  
8 branch (~30  $\mu\text{m}$ ) using Image J software.

9

1 **Fig. S2**

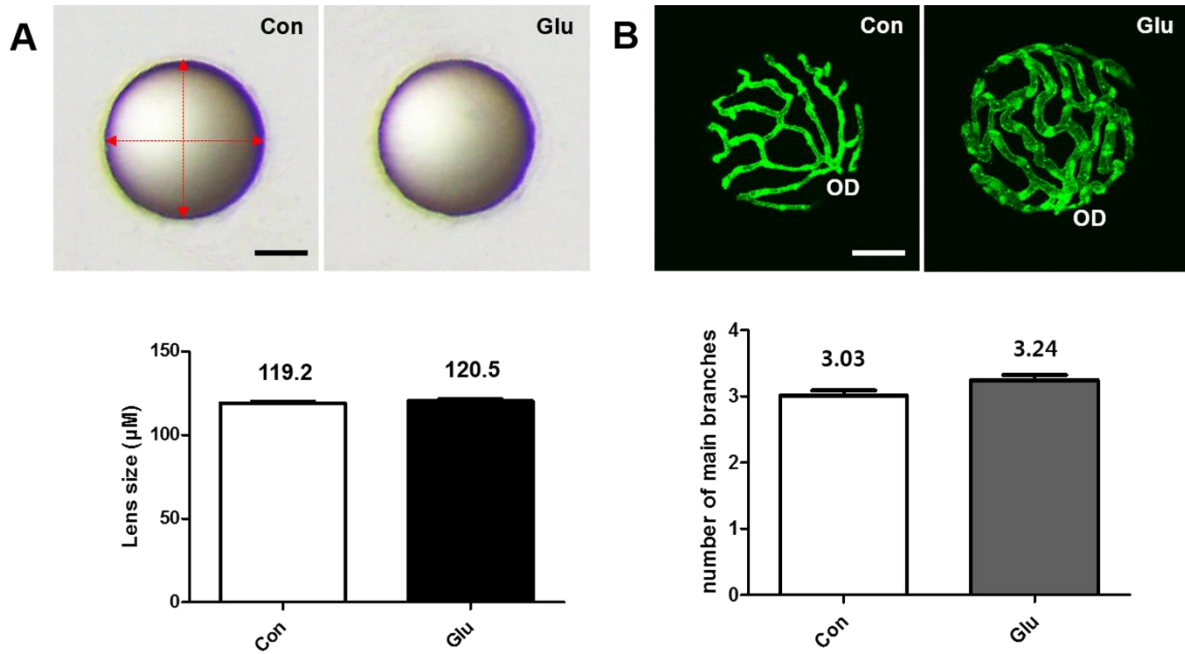

2

3 **Fig. S2.** Morphological effects on the patterning of the hyaloid vessels and lens size by HG.  
4 (A) The size of lenses were normal in control and HG-treated larvae. Control larvae, n=38;  
5 HG-treated larvae, n=40. Scale bar = 40 μm. (B) The number of main branches from the  
6 optic disc (OD) was counted in control and glucose-treated larvae. Control larvae, n=76; HG-  
7 treated larvae, n=72. Scale bar = 40 μm.

8

1 **Fig. S3.**

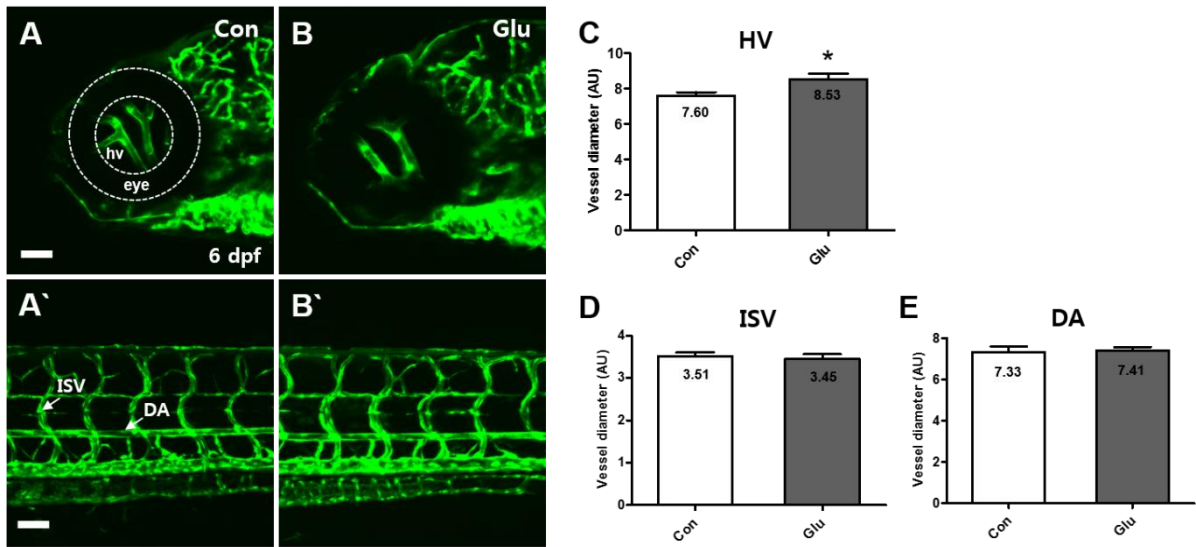

3 **Fig. S3.** Representative images of hyaloid-retinal vessels and trunk vessels in 6 dpf zebrafish.  
4 (A,A',B,B') There were no differences in intersomite vessels (ISVs) and dorsal aorta (DA)  
5 between the control (A, A') and HG-treated groups (B, B'). 250 $\times$  magnification, n=4 in each  
6 group. Scale bar = 50  $\mu$ m. (C-E) The graph displays the mean artificial unit (AU) for  
7 diameter of ISVs and DA. The vessel diameter of each region was measured three times.  
8 The experiment was repeated triplicate. \*P < 0.05 vs. control.

9
